# Supplementary material
Source: Elsevier journal article supplement (https://www.sciencedirect.com/science/article/pii/S1885585716301529)
Supplement: mmc1 [file S1885585716301529:mmc1.pdf]

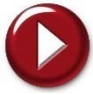

## Material suplementario

---

### **Social Inequalities in Cardiovascular Risk Factors Among Older Adults in Spain: The Seniors-ENRICA Study**

Bibiana Pérez-Hernández <sup>◇</sup>, Esther García-Esquinas <sup>\*,◇</sup>, Auxiliadora Graciani, Pilar Guallar  
Castillón, Esther López García, Luz M. León Muñoz, José R. Banegas y Fernando Rodríguez  
Artalejo

Departamento de Medicina Preventiva y Salud Pública, Facultad de Medicina, Universidad Autónoma  
de Madrid/IdiPaz, CIBER de Epidemiología y Salud Pública, CIBERESP, Madrid, España

---

Tabla 1 del material suplementario

Características de los participantes en el estudio, por nivel educativo

|                                                        | Total<br>(n = 2.699) | Primarios<br>o menos<br>(n = 1.527) | Secundarios<br>(n = 627) | Universitarios<br>(n = 545) | p       |
|--------------------------------------------------------|----------------------|-------------------------------------|--------------------------|-----------------------------|---------|
| <i>Edad (años)</i>                                     | 69,2 ± 0,2           | 70,2 ± 0,2                          | 67,7 ± 0,3               | 67,9 ± 0,3                  | < 0,001 |
| <i>Varones, %</i>                                      | 47,0                 | 38,4                                | 54,8                     | 63,9                        | < 0,001 |
| <i>Ocupación no manual, %</i>                          | 62,3                 | 46,1                                | 73,8                     | 98,2                        | < 0,001 |
| <i>Ocupación del padre no manual, %</i>                | 61,3                 | 52,9                                | 68,2                     | 78,8                        | < 0,001 |
| <i>Consumo de tabaco, %</i>                            |                      |                                     |                          |                             | < 0,001 |
| Nunca fumador                                          | 58,7                 | 69,6                                | 47,5                     | 39,2                        |         |
| Exfumador                                              | 29,9                 | 22,5                                | 36,8                     | 43,8                        |         |
| Fumador actual                                         | 11,4                 | 7,9                                 | 15,7                     | 16,9                        |         |
| <i>Consumo de alcohol, %</i>                           |                      |                                     |                          |                             | < 0,001 |
| Nunca bebedor                                          | 38,8                 | 44,6                                | 31,3                     | 30,1                        |         |
| Exbebedor                                              | 8,8                  | 9,9                                 | 8,1                      | 6,2                         |         |
| Consumo moderado                                       | 44,4                 | 38,6                                | 50,5                     | 54,8                        |         |
| Consumo excesivo                                       | 8,0                  | 6,9                                 | 10,0                     | 8,9                         |         |
| <i>Dieta mediterránea<sup>a</sup>, %</i>               | 16,3                 | 16,0                                | 16,5                     | 17,1                        | 0,877   |
| <i>Actividad física en tiempo libre (MET h/semana)</i> | 21,5 ± 0,4           | 19,2 ± 0,4                          | 23,1 ± 0,8               | 26,8 ± 0,9                  | < 0,001 |
| <i>Actividad física total, %</i>                       |                      |                                     |                          |                             | < 0,001 |
| Inactivo                                               | 45,7                 | 48,7                                | 41,8                     | 40,9                        |         |
| Moderadamente inactivo                                 | 33,3                 | 34,2                                | 33,4                     | 30,6                        |         |
| Moderadamente activo                                   | 15,2                 | 12,8                                | 17,7                     | 19,6                        |         |
| Activo                                                 | 5,8                  | 4,2                                 | 7,1                      | 8,9                         |         |
| <i>Televisión (h/semana)</i>                           | 18,5 ± 0,3           | 20,2 ± 0,4                          | 17,6 ± 0,5               | 14,1 ± 0,5                  | < 0,001 |
| <i>Obesidad general, %</i>                             | 34,4                 | 40,6                                | 28,5                     | 22,8                        | < 0,001 |
| <i>Obesidad abdominal, %</i>                           | 59,7                 | 67,0                                | 50,9                     | 48,2                        | < 0,001 |
| <i>Hipertensión, %</i>                                 | 67,7                 | 69,7                                | 64,4                     | 65,8                        | 0,066   |
| <i>Hipercolesterolemia, %</i>                          | 70,4                 | 72,2                                | 68,5                     | 67,3                        | 0,117   |
| <i>Diabetes mellitus, %</i>                            | 17,4                 | 19,4                                | 14,8                     | 14,5                        | < 0,050 |
| <i>Síndrome metabólico, %</i>                          | 41,3                 | 46,2                                | 36,6                     | 31,8                        | < 0,001 |
| <i>Enfermedad cardiovascular, %</i>                    | 5,7                  | 6,8                                 | 5,0                      | 3,2                         | 0,016   |

|                                          |           |           |           |           |         |
|------------------------------------------|-----------|-----------|-----------|-----------|---------|
| <i>Riesgo cardiovascular<sup>b</sup></i> | 3,1 ± 0,1 | 2,8 ± 0,1 | 3,3 ± 0,1 | 3,6 ± 0,2 | < 0,001 |
|------------------------------------------|-----------|-----------|-----------|-----------|---------|

<sup>a</sup>Índice MEDAS ≥ 9 puntos.

<sup>b</sup>Riesgo de enfermedad cardiovascular mortal, estimado con la ecuación SCORE de países de bajo riesgo y asumiendo que todos los sujetos tienen 60 años.

Salvo otra indicación, los valores expresan media ± desviación estándar.

**Tabla 2 del material suplementario**

Características de los participantes en el estudio, por ocupación

|                                                        | Total<br>(n = 2.699) | Manual<br>(n = 965) | No manual<br>(n = 1.734) | p       |
|--------------------------------------------------------|----------------------|---------------------|--------------------------|---------|
| <i>Edad (años)</i>                                     | 69,2 ± 0,2           | 69,4 ± 0,3          | 69,0 ± 0,2               | 0,349   |
| <i>Varones, %</i>                                      | 47,0                 | 42,9                | 49,5                     | 0,010   |
| <i>Nivel de estudios, %</i>                            |                      |                     |                          | < 0,001 |
| Primarios o menos                                      | 58,0                 | 83,0                | 42,9                     |         |
| Secundarios                                            | 23,2                 | 16,1                | 27,4                     |         |
| Universitarios                                         | 18,8                 | 1,0                 | 29,7                     |         |
| <i>Ocupación del padre no manual, %</i>                | 61,3                 | 42,7                | 72,6                     | < 0,001 |
| <i>Consumo de tabaco, %</i>                            |                      |                     |                          | < 0,010 |
| Nunca fumador                                          | 58,7                 | 63,3                | 56,0                     |         |
| Exfumador                                              | 29,9                 | 25,4                | 32,6                     |         |
| Fumador actual                                         | 11,4                 | 11,3                | 11,5                     |         |
| <i>Consumo de alcohol, %</i>                           |                      |                     |                          | < 0,001 |
| Nunca bebedor                                          | 38,8                 | 43,3                | 36,1                     |         |
| Exbebedor                                              | 8,8                  | 11,3                | 7,2                      |         |
| Consumo moderado                                       | 44,4                 | 38,6                | 48,0                     |         |
| Consumo excesivo                                       | 8,0                  | 6,8                 | 8,8                      |         |
| <i>Dieta mediterránea<sup>a</sup>, %</i>               | 16,3                 | 16,2                | 16,4                     | 0,916   |
| <i>Actividad física en tiempo libre (MET h/semana)</i> | 21,5 ± 0,4           | 20,4 ± 0,6          | 22,2 ± 0,5               | < 0,010 |
| <i>Actividad física global, %</i>                      |                      |                     |                          | < 0,001 |
| Inactivo                                               | 45,7                 | 48,8                | 43,8                     |         |
| Moderadamente inactivo                                 | 33,3                 | 34,5                | 32,6                     |         |
| Moderadamente activo                                   | 15,2                 | 10,8                | 17,9                     |         |
| Activo                                                 | 5,8                  | 6,0                 | 5,7                      |         |
| <i>Televisión (h/semana)</i>                           | 18,5 ± 0,3           | 20,0 ± 0,4          | 17,6 ± 0,3               | < 0,001 |
| <i>Obesidad general, %</i>                             | 34,4                 | 40,5                | 30,7                     | < 0,001 |
| <i>Obesidad abdominal, %</i>                           | 59,7                 | 65,2                | 56,4                     | < 0,001 |
| <i>Hipertensión, %</i>                                 | 67,7                 | 70,4                | 66,1                     | < 0,050 |
| <i>Hipercolesterolemia, %</i>                          | 70,4                 | 71,2                | 69,9                     | 0,557   |
| <i>Diabetes mellitus, %</i>                            | 17,4                 | 21,9                | 14,6                     | < 0,001 |
| <i>Síndrome metabólico, %</i>                          | 41,3                 | 45,1                | 39,0                     | < 0,010 |
| <i>Enfermedad cardiovascular, %</i>                    | 5,7                  | 6,7                 | 5,1                      | 0,151   |
| <i>Riesgo cardiovascular<sup>b</sup></i>               | 3,1 ± 0,6            | 3,1 ± 0,1           | 3,1 ± 0,1                | 0,939   |

<sup>a</sup>Índice MEDAS ≥ 9 puntos.<sup>b</sup>Riesgo de enfermedad cardiovascular mortal, estimado con la ecuación SCORE de países de bajo riesgo y asumiendo que todos los sujetos tienen 60 años.

Salvo otra indicación, los valores expresan media ± desviación estándar.

Tabla 3 del material suplementario

Características de los participantes, por ocupación del padre

|                                                                | Total<br>(n = 2.699) | Ocupación<br>manual del<br>padre<br>(n = 1.044) | Ocupación<br>no manual del<br>padre (n =<br>1.655) | p       |
|----------------------------------------------------------------|----------------------|-------------------------------------------------|----------------------------------------------------|---------|
| <i>Edad (años)</i>                                             | 69,2 ± 0,2           | 69,0 ± 0,3                                      | 69,3 ± 0,2                                         | 0,128   |
| <i>Varones, %</i>                                              | 47,0                 | 45,8                                            | 47,8                                               | 0,415   |
| <i>Nivel de estudios, %</i>                                    |                      |                                                 |                                                    | < 0,001 |
| Primarios o menos                                              | 58,0                 | 70,6                                            | 50,0                                               |         |
| Secundarios                                                    | 23,2                 | 19,1                                            | 25,8                                               |         |
| Universitarios                                                 | 18,8                 | 10,3                                            | 24,2                                               |         |
| <i>Ocupación no manual,<br/>%</i>                              | 62,3                 | 44,2                                            | 73,8                                               | < 0,001 |
| <i>Consumo de tabaco, %</i>                                    |                      |                                                 |                                                    | 0,159   |
| Nunca fumador                                                  | 58,7                 | 60,6                                            | 57,6                                               |         |
| Exfumador                                                      | 29,9                 | 27,4                                            | 31,4                                               |         |
| Fumador actual                                                 | 11,4                 | 12,1                                            | 11,0                                               |         |
| <i>Consumo de alcohol, %</i>                                   |                      |                                                 |                                                    | 0,058   |
| Nunca bebedor                                                  | 38,8                 | 39,0                                            | 38,7                                               |         |
| Exbebedor                                                      | 8,8                  | 10,8                                            | 7,5                                                |         |
| Consumo moderado                                               | 44,4                 | 43,2                                            | 45,2                                               |         |
| Consumo excesivo                                               | 8,0                  | 7,0                                             | 8,6                                                |         |
| <i>Dieta mediterránea<sup>a</sup>, %</i>                       | 16,3                 | 15,9                                            | 16,5                                               | 0,726   |
| <i>Actividad física en<br/>tiempo libre (MET<br/>h/semana)</i> | 21,5 ± 0,4           | 20,6 ± 0,6                                      | 22,1 (0,5)                                         | 0,087   |
| <i>Actividad física total, %</i>                               |                      |                                                 |                                                    | 0,034   |
| Inactivo                                                       | 45,7                 | 48,9                                            | 43,6                                               |         |
| Moderadamente<br>inactivo                                      | 33,3                 | 33,0                                            | 33,6                                               |         |
| Moderadamente activo                                           | 15,2                 | 12,4                                            | 17,0                                               |         |
| Activo                                                         | 5,8                  | 5,7                                             | 5,9                                                |         |
| <i>Televisión (h/semana)</i>                                   | 18,5 ± 0,3           | 18,7 ± 0,4                                      | 18,3 ± 0,4                                         | 0,063   |
| <i>Obesidad general, %</i>                                     | 34,4                 | 37,7                                            | 32,4                                               | < 0,050 |
| <i>Obesidad abdominal, %</i>                                   | 59,7                 | 61,1                                            | 58,8                                               | 0,323   |
| <i>Hipertensión, %</i>                                         | 67,7                 | 69,0                                            | 67,0                                               | < 0,050 |
| <i>Hipercolesterolemia, %</i>                                  | 70,4                 | 68,6                                            | 71,6                                               | 0,180   |
| <i>Diabetes mellitus, %</i>                                    | 17,4                 | 19,2                                            | 16,3                                               | 0,136   |
| <i>Síndrome metabólico, %</i>                                  | 41,3                 | 44,0                                            | 39,5                                               | 0,068   |
| <i>Enfermedad<br/>cardiovascular, %</i>                        | 5,7                  | 6,6                                             | 5,2                                                | 0,188   |
| <i>Riesgo cardiovascular<sup>b</sup></i>                       | 3,1 (0,1)            | 3,0 (0,1)                                       | 3,1 (0,1)                                          | 0,409   |

<sup>a</sup>Índice MEDAS ≥ 9 puntos.<sup>b</sup>Riesgo de enfermedad cardiovascular mortal, estimado con la ecuación SCORE de países de bajo riesgo y asumiendo que todos los sujetos tienen 60 años.

Salvo otra indicación, los valores expresan media ± desviación estándar.
